# Supplementary material for: TRIg: a robust alignment pipeline for non-regular T-cell receptor and immunoglobulin sequences
Source: Springer Nature journal article supplement (doi:10.1186/s12859-016-1304-2), 2016-10-26
Supplement: 12859_2016_1304_MOESM1_ESM.pdf [file 12859_2016_1304_MOESM1_ESM.pdf]

## Supplementary data

Sheng-Jou Hung, Yi-Lin Chen, Chia-Hung Chu, Chuan-Chun Lee, Wan-Li Chen, Ya-Lan Lin, Min-Ching Lin, Chung-Liang Ho, Tsunglin Liu\*

### Supplementary Results

#### Public RACE data of human TR $\beta$ gene

To address the concern whether the presence of non-regular TR $\beta$  sequences is unique to our approach, we analyzed a public RACE data of human TR $\beta$  gene generated by a 454 sequencer (NCBI SRA accession SRR941034). For this dataset, IgBLAST was the most sensitive as it did not annotate only 0.5% of the reads (Table S2). In contrast, TRIg did not annotate 8.5% of the reads. For those reads, the V alignments by IgBLAST were either short (<20 bp in 71.0% of cases) or of low identities (<0.8 in 97.1% of alignments  $\geq$ 30 bp). This again suggests that IgBLAST is over-sensitive for non-regular VDJ sequences. Compared to our data, the overall consistency of annotations (Table S3) showed a similar pattern except that IgBLAST was more consistent with TRIg (71.2% of the annotations were identical) and there were relatively more non-identical annotations in the non-VJ categories. The better consistency between IgBLAST and TRIg was reasonable because the percentage of reads without a V segment in this dataset (28.0%) was smaller than that in our data (64.5%) according to TRIg. Many statements for our data still held for this dataset. For example, TRIg gave a better alignment than IMGT did for a majority of the non-identical annotations (Figure S2). The similar pattern of results suggests generality of these tools on RACE data of human TR $\beta$  gene.

However, there were still distinctions in the results. For example, IgBLAST gave a longer but of lower identity alignment for 38.5% of the reads with non-identical annotations in this dataset (Figure S2), much higher than the <1% in our data. For most (97.7%) of those reads, TRIg identified only a segment in the constant C region while IgBLAST reported V and/or J alignments. The V and J alignments by IgBLAST were either short (<20 bp in 79.4% of the cases) or of a low identity (<0.8 in 97.1% of alignments  $\geq$ 30 bp); therefore were less convincing. Similarly, IgBLAST reported an extra J alignment in 88.3% of the extra annotations and 96.8% of the J alignments were short (<20 bp). These again suggest the over-sensitivity of IgBLAST. In contrast, most of the constant C

segments identified by TRlg were from the same C locus, and they were likely primer sequences used in the RACE approach. Thus, TRlg's annotations for those reads were more convincing.

Another distinction was that between IgBLAST and TRlg, relatively more non-identical annotations appeared in the non-VJ category. For 15704 reads in the non-VJ category, TRlg found only a short C segment, which again was likely primer sequence. This suggests that the remaining segments were from non-TRB genes. To confirm the statement, the 15704 reads were aligned to human genome (h38) using BLAT (v35) and the best alignments were selected. The best alignments of 15528 reads fell outside TR $\beta$  gene locus. Along this line, we aligned all the reads to the human genome and found that 20.2% contained a segment that could be aligned to a non-TR $\beta$  locus. In contrast, only 0.2% of reads in our data could be aligned to a non-TR $\beta$  locus. This explained why TRlg failed to annotation 8.5% of reads and some reads were not fully aligned.

In the public RACE data of human TR $\beta$  gene, 42.7% of reads were non-regular, among which the most abundant class (52.8%) were sequences containing only a V segment. For those reads, it is possible that the sequencing started from the V segments but was not long enough to reach the J segments. The second most abundant class (26.9%) of non-regular reads were sequences containing only a short C segment. This echoed our discovery that a good portion of this public data contained sequences from a non-TR $\beta$  locus and a C segment (putative RT-PCR artifact) was concatenated to the non-TR $\beta$  segment. The next two abundant classes were non-regular reads with a C segment connecting only to a J segment (9.0%) or an intergenic segment (6.2%), respectively. Interestingly, most of the intergenic segments were from two TR $\beta$  loci, one in the upstream of TRBD1 and the other in the upstream of TRBC1, suggesting non-regular splicing events.

## Supplementary Tables

| <b>RT-PCR</b>  |                                |
|----------------|--------------------------------|
| 5' RACE primer | AAGCAGTGGTATCAACGCAGAGTACATGGG |
| TCRB-GSC1      | CACGTGGTCGGGGWAGAAGC           |

| <b>First PCR</b>                                                                                             |                                                                                                        |       |            |
|--------------------------------------------------------------------------------------------------------------|--------------------------------------------------------------------------------------------------------|-------|------------|
| 10x UPM                                                                                                      | Long (0.4uM)<br>CTAATACGACTCACTATAGGGCAAGCAGTGGTATCAACGCAGAGT<br>Short (2uM)<br>CTAATACGACTCACTATAGGGC |       |            |
| TCRB-GSC2                                                                                                    | GGGTGGGAACACCTTGTTCAGGT                                                                                |       |            |
| <b>Nested PCR</b>                                                                                            |                                                                                                        |       |            |
| UPM primer                                                                                                   | CTAATACGACTCACTATAGGGC                                                                                 |       |            |
| Adaptor-UPM primer (Seq primerA-key-MID1-UPM)<br>CGTATCGCCTCCCTCGCGCCATCAGACGCTCGACACTAATACGACTCACTATAGGGC   |                                                                                                        |       |            |
| TCRB-C1                                                                                                      | GGGTGGGAACACCTTGTTCAGGT                                                                                |       |            |
| Adaptor-TCRB-C1 (Seq primerB-key-MID1-TCRB-C1)<br>CTATGCGCCTTGCCAGCCCCTCAGACGAGTGCGTGGGTGGGAACACCTTGTTCAGGT  |                                                                                                        |       |            |
| TCRB-C2                                                                                                      | GGGTGGGAACACCTTTTTTCAGGT                                                                               |       |            |
| Adaptor-TCRB-C2 (Seq primerB-key-MID1-TCRB-C2)<br>CTATGCGCCTTGCCAGCCCCTCAGACGAGTGCGTGGGTGGGAACACCTTTTTTCAGGT |                                                                                                        |       |            |
| <b>454 Junior MID</b>                                                                                        |                                                                                                        |       |            |
| MID1                                                                                                         | ACGAGTGCGT                                                                                             | MID8  | CTCGCGTGTC |
| MID2                                                                                                         | ACGCTCGACA                                                                                             | MID9  | TAGTATCAGC |
| MID3                                                                                                         | AGACGCACTC                                                                                             | MID10 | TCTCTATGCG |
| MID4                                                                                                         | AGCACTGTAG                                                                                             | MID11 | TGATACGTCT |
| MID5                                                                                                         | ATCAGACACG                                                                                             | MID12 | TACTGAGCTA |
| MID6                                                                                                         | ATATCGCGAG                                                                                             | MID13 | CATAGTAGTG |
| MID7                                                                                                         | CGTGTCTCTA                                                                                             | MID14 | CGAGAGATAC |

Table S1. PCR primer for 5' RACE and the primer and barcode (MID) sequences used in 454 sequencing.

| Data      | Decombinator | IgBLAST | IMGT   | TRIg (including non-VJ annotations) |
|-----------|--------------|---------|--------|-------------------------------------|
| SRR941034 | 55,551       | 140,485 | 98,544 | 108,569 (129,198)                   |

Table S2. Number of VJ annotations by four programs to the SRR941034 data.

| TRIg v.s.    | Identical | Extra | Missing | Distinct | Non-VJ |
|--------------|-----------|-------|---------|----------|--------|
| Decombinator | 53,000    | 40    | 659     | 1852     | 0      |

|         |        |       |       |       |        |
|---------|--------|-------|-------|-------|--------|
| IgBLAST | 91,634 | 9,558 | 436   | 6,831 | 20,263 |
| IMGT    | 87,403 | 9,234 | 1,278 | 531   | 87     |

Table S3. Consistency of VJ annotations to the SRR941034 data.

## Supplementary Figures

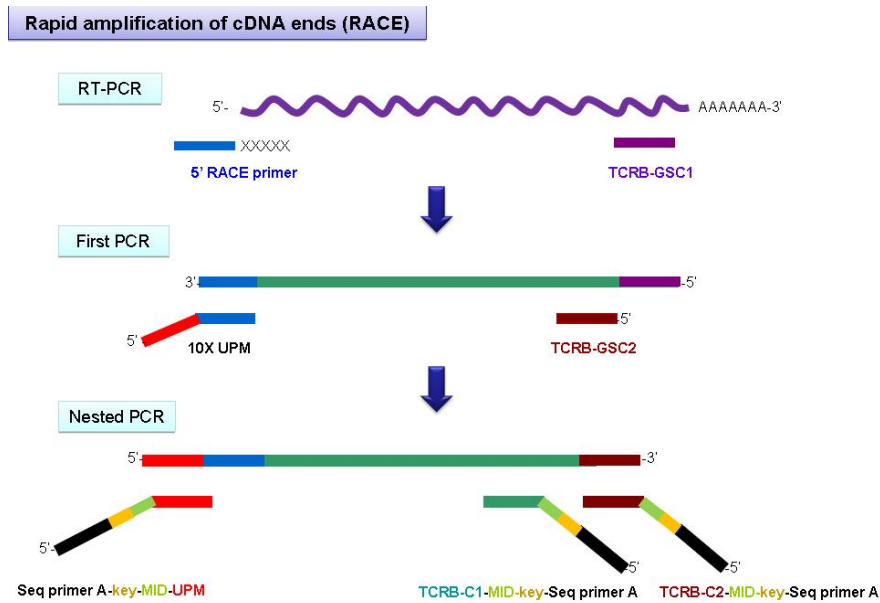

Figure S1. Flow of 5' RACE experiment. Please see Table S1 for the primer and MID sequences.

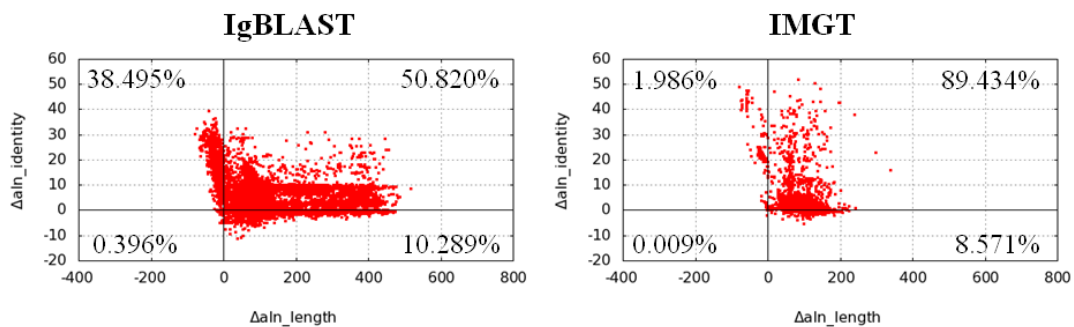

Figure S2. Comparison of alignments by different programs for the SRR941034 data. Please check Figure 2 of the main text for explanations.

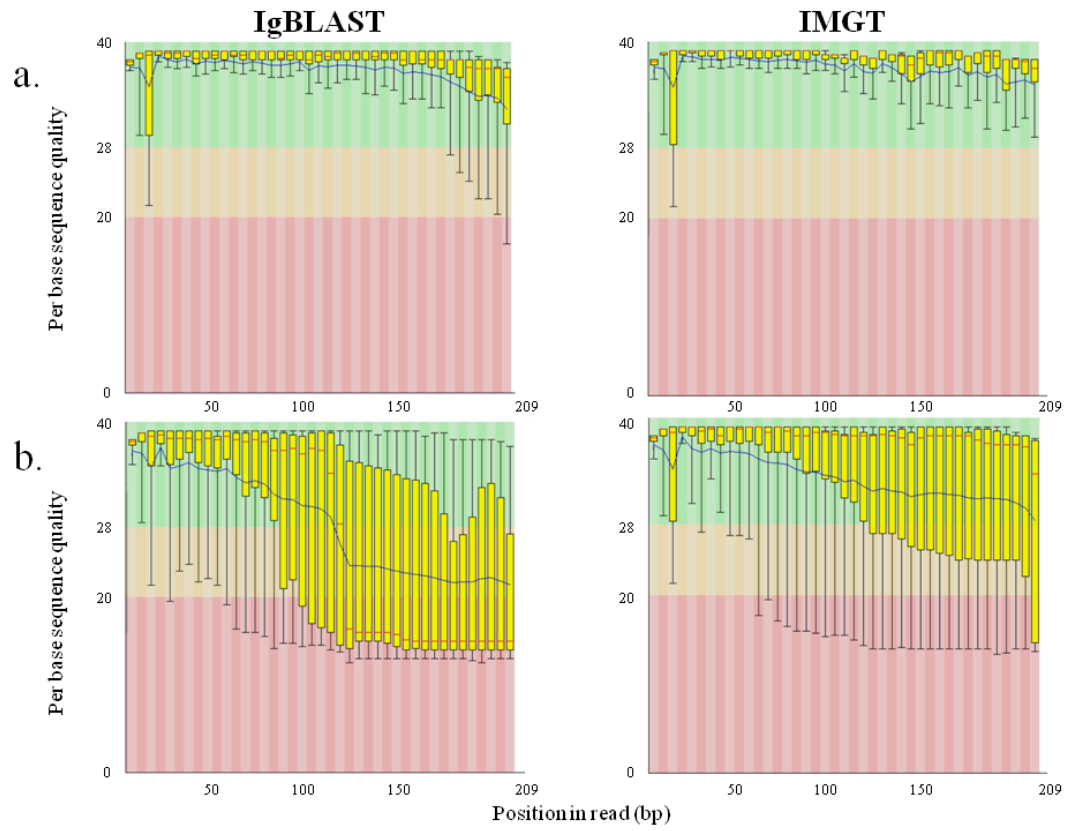

Figure S3. Base quality of reads in the (a) first and (b) second quadrant of Figure 2b of the main text when TRlg is compared to IgBLAST and IMGT.
